# Supplementary material
Source: Research Square preprint supplement (doi:10.21203/rs.3.rs-9068139/v1)
Supplement: Supplementary file 1 [file 1263971c27aa3cecb9aaa96c.xlsx]

## Sheet: Table2
No.	Gene Name	Reference Gene Name	Description	Chromosome	Strand (+/-)	Type	Intron Start	Intron End	Exon 1	Exon 2	Primer design	Gel check	SR	ONT cDNA	ONT DRS	SRA	Mean Poly(A) Length (nt)	Top Motif	Distance to TES (nt)	Median Poly(A) Length (nt)	Poly(A) IQR
1	TVAGG3_CG01	TVAGG3_1006950	Transcription-initiator DNA-binding domain IBD	CM044617	➕	TypeA	18361620	18361702	18,361,223 - 18,361,619	18,361,703 - 18,362,055	✔️	✔️	✔️	✔️	✔️	✔️	69.07	nan	209
2	TVAGG3_CG02	TVAGG3_0984150	Transcription-initiator DNA-binding domain IBD	CM044617	➖	TypeA	14164586	14164687	14,164,035 - 14,164,585	14,164,688 - 14,165,021	✔️	✔️	✔️	✔️	✔️	✔️		AATAAA	-2	77.46	0
3	TVAGG3_CG03	TVAGG3_0971890	Protein kinase-like (PK-like)	CM044617	➖	TypeA	11976290	11976398	11,975,356 - 11,976,289	11,976,399 - 11,977,010	✔️	✔️	✔️	✔️	✔️	✔️		AATAAA	3	90.245	0
4	TVAGG3_CG04	TVAGG3_0662830	Transcription-initiator DNA-binding domain IBD	CM044619	➕	TypeA	8102433	8102495	8,102,155 - 8,102,432	8,102,496 - 8,102,985	✔️	✔️	✔️	✔️	✔️	✔️		ATTAAA	756	75.6	18.07
5	TVAGG3_CG05	TVAGG3_0757690	Unknown	CM044619	➖	TypeA	24638656	24638715	24,637,086 - 24,638,655	24,638,716 - 24,638,876	✔️	❌	✔️	✔️	❌	✔️		ATTAAA	40	75.79	0
6	TVAGG3_CG06	TVAGG3_0684960	Zinc finger DHHC domain-containing protein	CM044619	➖	TypeA	11802775	11802864	11,802,236 - 11,802,774	11,802,865 - 11,803,521	✔️	✔️	✔️	✔️	❌	✔️		AATAAA	9	35.58	8.13
7	TVAGG3_CG07	TVAGG3_0034870	CAMK family protein kinase	CM044620	➖	TypeA	5385986	5386099	5,385,084 - 5,385,985	5,386,100 - 5,386,699	✔️	✔️	✔️	✔️	✔️	✔️		AATAAA	0	41.48	0
8	TVAGG3_CG08	TVAGG3_0432630	CENTAURIN / ARF family	CM044621	➕	TypeA	30748614	30748735	30,748,070 - 30,748,613	30,748,736 - 30,750,094	✔️	✔️	✔️	✔️	✔️	✔️	66.1492	AATAAA	-1	64.96	0
9	TVAGG3_CG09	TVAGG3_0321945	Protein kinase-like (PK-like)	CM044621	➖	TypeA	12153436	12153505	12,152,869 - 12,153,435	12,153,506 - 12,154,189	✔️	✔️	✔️	✔️	✔️	✔️		AATAAA	580	75.68	10.7338
10	TVAGG3_CG10	TVAGG3_0321030	Poly(A) polymerase	CM044621	➖	TypeA	11972372	11972465	11,971,254 - 11,972,371	11,972,466 - 11,972,923	✔️	✔️	✔️	✔️	✔️	✔️		nan	1950
11	TVAGG3_CG11	TVAGG3_0889910	CENTAURIN / ARF family	CM044622	➖	TypeA	18799621	18799736	18,798,220 - 18,799,620	18,799,737 - 18,800,296	✔️	❌	✔️	✔️	❌	✔️		ATTAAA	1	34.27	0
12	TVAGG3_CG12	TVAGG3_0480470	Unknown	CM044618	➕	TypeB	3680226	3680250	3,680,083 - 3,680,225	3,680,251 - 3,681,436	✔️	✔️	✔️	✔️	❌	❌		AATAAA	1408	67.1	12.69
13	TVAGG3_CG13	TVAGG3_0731840	Ribonuclease inhibitor	CM044619	➕	TypeB	19651639	19651663	19,651,576 - 19,651,638	19,651,664 - 19,653,792	✔️	❌	✔️	✔️	✔️	✔️	91.535	ATTAAA	1873	128.15	0
14	TVAGG3_CG14	TVAGG3_0143860	Unspecified product	CM044620	➕	TypeB	21863235	21863259	21,863,062 - 21,863,234	21,863,260 - 21,864,505	✔️	❌	✔️	✔️	✔️	✔️	67.2248	AATAAA	381	50.36	0
15	TVAGG3_CG15	TVAGG3_0124245	Unknown	CM044620	➖	TypeB	18354536	18354560	18,354,195 - 18,354,535	18,354,561 - 18,354,684	✔️	✔️	✔️	✔️	❌	✔️	31.2	ATTAAA	60	80.25	0
16	TVAGG3_CG16	TVAGG3_0420590	Sm-like ribonucleoprotein family	CM044621	➕	TypeB	28668188	28668212	28,668,105 - 28,668,187	28,668,213 - 28,668,460	✔️	❌	✔️	❌	✔️	❌	56.88	AATAAA	360	48.66	17.58
17	TVAGG3_CG17	TVAGG3_0841800	Armadillo (ARM) repeat-containing family (5'-UTR)	CM044622	➕	TypeB	10747420	10747444	10,747,314 - 10,747,419	10,747,445 - 10,748,579	✔️	✔️	✔️	✔️	✔️	✔️	69.48	AATAAA	50	96.43	23.57
