# Supplementary material
Source: Research Square preprint supplement (doi:10.21203/rs.3.rs-9068139/v1)
Supplement: Supplementary file 2 [file 235189ff3d0a7e335744c56b.xlsx]

## Sheet: TableS5
Gene ID	Forward Primer (5′–3′)	Reverse Primer (5′–3′)	gDNA Product Size (bp)	cDNA Product Size (bp)
Newly identified
TVAGG3_CG01(TVAGG3_1006950)	AAGGAAATGGAGGCGTACCG	TGGATCTCTAGTTGCCGCAT	288	218
TVAGG3_CG02(TVAGG3_0984150)	ATTCCGATGGCTATGCCTCC	TATGCCATTGCGGCGAGTAA	314	231
TVAGG3_CG03(TVAGG3_0971890)	CCATACCATGGGTTCCCTGC	CGACTGTTGGGATCGGAGTT	309	200
TVAGG3_CG04(TVAGG3_0662830)	TGCCCCACCCTGCAATTAAA	GCTTATGGAACAGGCCTCCA	579	476
TVAGG3_CG05(TVAGG3_0757690)	GCGTTTTTATGCACTTCTACATTCA	TGATGGCTGCTGGCGTAAAT	257	196
TVAGG3_CG06(TVAGG3_0684960)	ACTGCCGATGTAAATGTCGT	ACCTCACGAATGTCCAACTT	270	180
TVAGG3_CG07(TVAGG3_0034870)	AGTTATTCGCGGTCAGCAGT	CGGTGGATGAGGTAATGGAC	412	303
TVAGG3_CG08(TVAGG3_0432630)	GGACAACAATGAAACCCCTCG	GCCACCGTTTCTCTTTGTGA	277	214
TVAGG3_CG09(TVAGG3_0321945)	CGCGTGATTCGCAAAACCAA	TAAGTGACGGCGGAAGTTCG	446	324
TVAGG3_CG10(TVAGG3_0321030)	GGTTCTTACCGTTTAGGTGTCG	TCGGCAAAATCTGTATCTTCTG	312	234
TVAGG3_CG11(TVAGG3_0889910)	CAACGCGCCTTAGAAATTGT	GGTCGTTTCCGTTTGTCTGT	321	204
TVAGG3_CG12(TVAGG3_0480470)	TTGATGACCACCGCACTGAG	TGTTGACGTTTCAGAAGGAGGA	223	198
TVAGG3_CG13(TVAGG3_0731840)	TGAATGAAAAGGAAGCACAACA	GCGATTGAAATTTGTTGTTTCG	316	290
TVAGG3_CG14(TVAGG3_0143860)	GGAATCCCTTGAATCTGTGC	AGGTTTTGCTTCGTCTTTGG	465	439
TVAGG3_CG15(TVAGG3_0124245)	TGGGTTCGCATCCATCAGTT	TCGAGAGAATCATGTCAATTCAACG	292	267
TVAGG3_CG16(TVAGG3_0420590)	TGTCAATTGCAAGTTATGTTGG	GTACTGCTCCTGTGGCGTTT	193	167
TVAGG3_CG17(TVAGG3_0841800)	ATGAGTTCCGTTGAACCTGC	TGCTTGAGTTCCGAGGCAAA	292	267
Type A
TVAGG3_0972410	GATAGCTGACTTCGGTTTTGCT	CGTTGTGGTCTAACTCTTCACG	541	431
TVAGG3_0997450	CATACAGGGCTTCCCAAGAA	ACGCATATGCTCCCAGAATC	497	310
TVAGG3_0998160	AATCCATTTCTCGGCTACAGAA	CGGTGGTGCGTAGATATTGTTA	355	264
TVAGG3_0998660	GCAGGAATGCGTCATACAAC	CTGCCACCATGAGTTAGTCCTT	200	116
TVAGG3_1019300	TTCTCTGCTTTTGAGTTCGATG	GGTTACCAACACTGCCTGAAAT	413	346
TVAGG3_1043790	TGATAGCTCTACGCAAGAAGCA	AACCGTAATACGTGGCTGTGTA	160	92
TVAGG3_1058000	TCACAGCAGCATTATCAAGA	CCTGACAAGACTTATTGAAAGACC	278	219
TVAGG3_0511450	CCAGAGAAACATCGTGGTGATA	CGTCAGGAGGATCATAAAATGG	193	115
TVAGG3_0644560	TCTTCGTCATCCTCATGTTGTC	TTACTTCCACCACCAAAAGA	401	334
TVAGG3_0661130	TTACTTGCAGACTTCGGTTTTG	CTCGTCAGAGACATCGTCAAAG	354	261
TVAGG3_0677070	CAAAGAAGCCCAAGAACTGACT	GAGGAGGACATTGTCTGGTTTC	686	490
TVAGG3_0764700	GTATCCTTGCCAAATCCTTCTG	ACAGCTTCCGAAATCAACTAGC	510	417
TVAGG3_0136820	CAGAAGGAGTTGAATGGAAATG	GCGACATGCATCAAAGTTAATC	185	113
TVAGG3_0182080	CGACACGTTCGTTACCATATTC	AATCTGCGTGAGGATCAGAAAC	229	159
TVAGG3_0199570	CGATAAAGTAGGCGAAGGTCAT	GGGAGAGTCCTTCAAAATTCCT	404	299
TVAGG3_0288310	CAGTGCTCCACCACAACCTA	TACATCGAGCACAAGGGTAA	248	172
TVAGG3_0299880	ACAGAATCAAGATTGCCGACTT	AAGATGGGTGTATCGGTGTAGG	536	402
TVAGG3_0403570	GGCAGGAAAATACGATGAAAAC	CGAAAGAAAGCATTGGAAGAGT	256	188
TVAGG3_0852200	GGCAAGCATGTTTAAAAGGTGT	GGTGAAATTGCCGAGTCTTT	343	262
TVAGG3_0860620	CTTCCTAATGGAAACCTTGACG	CATCGTTGGAGGGTAAATAGGA	527	428
Type B
TVAGG3_0656270	GGTTGGCTCGAACGTAAGTT	TGTGCATTCTTCATCTTTCC	124	99
TVAGG3_0006570	ATCCATGACTGCTAATGA	CAGAGAACATATCTTCGGCAAA	139	114
TVAGG3_0032670	TCAGAAATTTAGTGCGATGAGC	AATCTTCATAGCACCGATGACC	126	101
TVAGG3_0108840	AGCGTGGGGAGCTGAATTTGG	CTGCTATTCAATAGAATGTCAATGAACTG	161	136
TVAGG3_0283200	GGCGTGAGAACATTAAATGAAG	AAGCGTGGGATCCTATAACAGA	134	109
Unclassified
TVAGG3_0536040	GGCTAAAGAAGCTGCTGAAAAG	GCGTTTCTTGATTTCTTCTGCT	1128	639
TVAGG3_0562330	AAACAGAGCAGCCTGAACAG	TACCTGGTTGTTCTGGCT	2422	125
TVAGG3_0047895	CAAAGCACAAGAGAGAAGTTGC	GTTTGGGTTTTCACAGGACAAT	915	386
TVAGG3_0276730	GTGGTATGCAGATTTTCGTCAA	CCTTTTGGATGGAGTAGTCCTG	423	195
TVAGG3_0367480	TCCAACAGGCCCAATTACTATC	GTAAGCACCCTGTGGTGGAT	142	106
TVAGG3_0792740	AAGGACTATCCGGAAGTGATGA	TGAGGCCAACTTTAGATCCTTT	168	104
