# Supplementary material
Source: Research Square preprint supplement (doi:10.21203/rs.3.rs-9068139/v1)
Supplement: Supplementary file 3 [file 3bab713dcb86b52ebc946a54.xlsx]

## Sheet: Supp.Table2_V826
	Gene ID (This Study)		2007 Assembly ID	G3 2022 ID	Strand	Type	Status	Remarks	Product	Gel	SR	ONT cDNA	ONT DRS	Mean Poly(A) Length (nt)	Top Motif	Distance to TES (nt)	Median Poly(A) Length (nt)	Poly(A) IQR
1	TVAGG3_CG03		NA	TVAGG3_0971890	minus	A	Newly identified		Protein kinase domain	✔️	✔️	✔️	✔️		AATAAA	691	90.245	0
2	TVAGG3_0972410		TVAG_053820	TVAGG3_0972410	plus	A	Validated		Protein kinase domain	✔️	✔️	✔️	✔️	93.7009	AATAAA	-3	90.245	0
3	TVAGG3_CG02		TVAG_083210	TVAGG3_0984150	minus	A	Newly identified		Initiator binding domain	✔️	✔️	✔️	✔️		AATAAA	101	77.46	0
4	Lrmix.3241.1		TVAG_014050	TVAGG3_0986220	plus	A	Newly identified		Unknown		✔️	✔️	✔️
5	TVAGG3_0997450		TVAG_110580	TVAGG3_0997450	minus	A	Validated		Pleckstrin homology domain	✔️	✔️	✔️	✔️		ATTAAA	104	74.04	0
6	Lrmix.3913.1/3914.1		NA	TVAGG3_0998030	minus	A	Newly identified	TVAGG3_0105790 paralog	Pre-mRNA-splicing factor 18		✔️	❌	❌		AATAAA	1807	64.5875	5.1725
7	TVAGG3_0998160		TVAG_110020	TVAGG3_0998160	minus	A	Validated		Transcription initiation factor TFIID subunit 6	✔️	✔️	✔️	✔️		AATAAA	63	73.005	0
8	TVAGG3_0998660		TVAG_198230	TVAGG3_0998660	plus	A	Validated		RNA-binding ASCH domain protein	✔️	✔️	✔️	✔️	83.112	AATAAA	255	78.67	25.87
9	TVAGG3_CG01		TVAG_256480	TVAGG3_1006950	plus	A	Newly identified		Initiator binding domain	✔️	✔️	✔️	✔️	69.07		-22
10	TVAGG3_1019300		TVAG_085780	TVAGG3_1019300	plus	A	Validated		Unknown	✔️	✔️	✔️	✔️		AATAAA	19	64.2	0
11	Lrmix.5344.1		TVAG_065350	TVAGG3_1032880	minus	A	Newly identified		P-loop containing nucleoside triphosphate hydrolase		✔️	✔️	✔️			-14
12	Lrmix.390.1		TVAG_449120	TVAGG3_0914340	minus	A	Newly identified		Protein kinase domain		✔️	✔️	✔️		ATTAAA	1988	75.09	19.3975
13	TVAGG3_1043790		TVAG_413420	TVAGG3_1043790	plus	A	Validated		Protein kinase domain	✔️	✔️	✔️	✔️	76.8633	AATAAA	1099	87.015	23.355
14	TVAGG3_1058000		TVAG_176980	TVAGG3_1058000	plus	A	Validated		Protein kinase domain	✔️	✔️	✔️	✔️	47.0229	AATAAA	1631	78.54	29.08
15	LRmix.8891.1		TVAG_478980	TVAGG3_0535830	minus	A	Newly identified		U6 snRNA-associated Sm-like protein Lsm3		✔️	✔️	❌		AATAAA	-7	78.31	19.255
16	TVAGG3_0511450		TVAG_087980	TVAGG3_0511450	plus	A	Validated		Protein kinase domain	✔️	✔️	✔️	✔️		AATAAA	-427	38.78	21.43
17	TVAGG3_0677070		TVAG_020880	TVAGG3_0677070	minus	A	Validated		Protein kinase domain	✔️	✔️	✔️	✔️		AATAAA	89	68.87	15.16
18	TVAGG3_CG06		TVAG_082240	TVAGG3_0684960	minus	A	Newly identified		Palmitoyltransferase, DHHC domain	✔️	✔️	✔️	✔️		AATAAA	1	35.58	8.13
19	TVAGG3_CG05		TVAG_102700	TVAGG3_0757690	minus	A	Newly identified		Unknown		✔️	✔️	✔️		ATTAAA	67	75.79	0
20	TVAGG3_0764700		TVAG_306990	TVAGG3_0764700	plus	A	Validated		Protein kinase domain	✔️	✔️	✔️	✔️	48.9596	AATAAA	8	44.285	0
21	TVAGG3_0644560		TVAG_460790	TVAGG3_0644560	minus	A	Validated		FCP1 homology domain	✔️	✔️	✔️	✔️		AATAAA	300	86.1075	21.5325
22	TVAGG3_0661130		TVAG_148640	TVAGG3_0661130	minus	A	Validated		Protein kinase domain	✔️	✔️	✔️	✔️			26
23	TVAGG3_CG04		NA	TVAGG3_0662830	plus	A	Newly identified		Initiator binding domain	✔️	✔️	✔️	✔️		ATTAAA	755	75.6	18.07
24	n/a		TVAG_588540	TVAGG3_0105790	minus	A	Newly identified	TVAGG3_0998030 paralog	Pre-mRNA-splicing factor 18		✔️	❌	❌		AATAAA	1433	64.5875	5.1725
25	TVAGG3_0136820		TVAG_217460	TVAGG3_0136820	minus	A	Validated		Ankyrin repeat-containing domain	✔️	✔️	✔️	✔️	57.8633		425
26	TVAGG3_0182080		TVAG_390460	TVAGG3_0182080	minus	A	Validated		FCP1 homology domain	✔️	✔️	✔️	✔️		AATAAA	154	58.16	0.32
27	TVAGG3_0199570		TVAG_125100	TVAGG3_0199570	minus	A	Validated		Protein kinase domain	✔️	✔️	✔️	✔️		AATAAA	20	89	0
28	Lrmix.18180.2		TVAG_360840	TVAGG3_0031770	plus	A	Newly identified		Ankyrin repeat		✔️	✔️	✔️			-37
29	TVAGG3_CG07		TVAG_350500	TVAGG3_0034870	minus	A	Validated		Protein kinase domain	✔️	✔️	✔️	✔️		AATAAA	17	41.48	0
30	TVAGG3_CG10		TVAG_388620	TVAGG3_0321030	minus	A	Validated		Polymerase, nucleotidyl transferase domain	✔️	✔️	✔️	✔️			80
31	TVAGG3_CG09		NA	TVAGG3_0321945	minus	A	Newly identified		Protein kinase domain	✔️	✔️	✔️	✔️		AATAAA	580	75.68	10.7338
32	n/a		TVAG_185940	TVAGG3_0392230	plus	A	Newly identified		Protein kinase domain		✔️	✔️	✔️		AATAAA	1319	93.9725	18.0125
33	TVAGG3_0403570		TVAG_147850	TVAGG3_0403570	minus	A	Validated		Protein kinase domain	✔️	✔️	✔️	✔️		AATAAA	158	73.575	31.2425
34	TVAGG3_CG08		TVAG_439740	TVAGG3_0432630	plus	A	Newly identified		Arf GTPase activating protein	✔️	✔️	✔️	✔️	66.1492	AATAAA	50	64.96	0
35	TVAGG3_0288310		TVAG_225200	TVAGG3_0288310	minus	A	Validated		FCP1 homology domain	✔️	✔️	✔️	✔️	95.26		-328
36	TVAGG3_0299880		TVAG_065500	TVAGG3_0299880	plus	A	Validated		Protein kinase domain	✔️	✔️	✔️	✔️	87.1875	ATTAAA	95	78.67	0
37	TVAGG3_0852200		TVAG_014960	TVAGG3_0852200	plus	A	Validated		TAF6, C-terminal HEAT repeat domain	✔️	✔️	✔️	✔️	46.32	AATAAA	81	53.0275	7.1125
38	TVAGG3_0860620		TVAG_126240	TVAGG3_0860620	plus	A	Validated		Protein kinase domain	✔️	✔️	✔️	✔️	73.0033	ATTAAA	776	69.5325	5.8675
39	TVAGG3_CG11		TVAG_230890	TVAGG3_0889910	minus	A	Newly identified		Arf GTPase activating protein		✔️	✔️	✔️		ATTAAA	85	34.27	0
40	n/a		TVAG_430710	TVAGG3_1017660	plus	B	Newly identified		Ankyrin repeat-containing domain		✔️	✔️	✔️		AATAAA	1	59.7125	1.1375
41	n/a		TVAG_177150	TVAGG3_1058190	plus	B	Newly identified		Armadillo-type fold		✔️	✔️	✔️		AATAAA	92	71.31	13.8825
42	n/a		TVAG_499270	TVAGG3_0930320	minus	B	Newly identified	TVAGG3_0931505 paralog	Dynein light chain Tctex-1 like		✔️	✔️	✔️		ATTAAA	45	59.3325	11.1675
43	n/a		TVAG_499270	TVAGG3_0931505	plus	B	Newly identified	TVAGG3_0930320 paralog	Dynein light chain Tctex-1 like		✔️	✔️	✔️		ATTAAA	12	59.3325	11.1675
44	n/a		TVAG_364020	TVAGG3_0948240	plus	B	Newly identified		Cyclin-dependent kinase inhibitor 2C-related		✔️	✔️	✔️		ATTAAA	36	46.51	0
45	n/a		TVAG_196970	TVAGG3_0681590	minus	B	Newly identified		Armadillo-type fold		✔️	✔️	❌		ATTAAA	1954	90.33	20.255
46	n/a		TVAG_043010	TVAGG3_0701590	minus	B	Newly identified		Armadillo-type fold		✔️	✔️	✔️		AATAAA	3	69.88	0
47	TVAGG3_CG13		TVAG_015510	TVAGG3_0731840	plus	B	Newly identified		Leucine-rich repeat domain superfamily		✔️	✔️	✔️	91.535	ATTAAA	1847	128.15	0
48	Lrmix.15628.1		NA	TVAGG3_0732885	plus	B	Newly identified		Unknown		✔️	❌	❌			0
49	n/a		TVAG_181660	TVAGG3_0773150	plus	B	Newly identified		Unknown		✔️	✔️	✔️		AATAAA	292	51.52	3.74
50	TVAGG3_0656270		TVAG_089630	TVAGG3_0656270	minus	B	Validated		Pleckstrin homology domain	✔️	✔️	✔️	✔️		ATTAAA	347	57.575	0
51	TVAGG3_0006570		TVAG_383350	TVAGG3_0006570	plus	B	Validated		Small GTPase	✔️	✔️	✔️	✔️	55.3918	AATAAA	1393	53.345	12.945
52	n/a		NA	TVAGG3_0073825	minus	B	Newly identified		Small GTPase superfamily, ARF/SAR type		✔️	✔️	✔️			1066
53	TVAGG3_0108840		TVAG_203580	TVAGG3_0108840	minus	B	Validated		Armadillo-type fold	✔️	✔️	✔️	✔️		AATAAA	-2	79.225	12.025
54	TVAGG3_CG15		NA	TVAGG3_0124245	minus	B	Newly identified		Unknown		✔️	✔️	✔️	31.2	ATTAAA	1	80.25	0
55	TVAGG3_CG14		TVAG_221190	TVAGG3_0143860	plus	B	Newly identified		Unknown		✔️	✔️	✔️	67.2248	AATAAA	1651	86.84	45.115
56	n/a		TVAG_019780	TVAGG3_0185960	plus	B	Newly identified		Unknown		✔️	✔️	✔️		ATTAAA	1409	49.96	28.025
57	n/a		TVAG_412940	TVAGG3_0002250	minus	B	Newly identified		Unknown		✔️	✔️	✔️		AATAAA	1	48.56	0
58	TVAGG3_0032670		TVAG_043580	TVAGG3_0032670	minus	B	Validated		MOB kinase activator family	✔️	✔️	✔️	✔️		ATTAAA	1195	53.5975	10.3475
59	n/a		TVAG_001620	TVAGG3_0315850	minus	B	Newly identified		Unknown		✔️	✔️	✔️		AATAAA	1497	77.46	17.6
60	n/a		TVAG_078330	TVAGG3_0388310	plus	B	Newly identified		Unknown		✔️	✔️	✔️		AATAAA	116	56.1825	3.5475
61	TVAGG3_CG16		NA	TVAGG3_0420590	plus	B	Newly identified		LSM domain superfamily		✔️	✔️	✔️	56.88	AATAAA	275	48.66	17.58
62	TVAGG3_0283200		TVAG_242770	TVAGG3_0283200	minus	B	Validated		Armadillo-type fold	✔️	✔️	✔️	✔️		AATAAA	1339	72.77	11.95
63	TVAGG3_CG17		TVAG_269270	TVAGG3_0841800	plus	B	Validated		Armadillo-type fold	✔️	✔️	✔️	✔️	69.48	AATAAA	50	96.43	23.57
64	TVAGG3_CG12		NA	TVAGG3_0480470	plus	B	Newly identified		Unknown	✔️	✔️	✔️	✔️
