# Supplementary material
Source: Research Square preprint supplement (doi:10.21203/rs.3.rs-9068139/v1)
Supplement: Supplementary file 4 [file c5db4d693fe4d6cd20dac749.xlsx]

## Sheet: Table1
No.	Gene Name	Description	Chromosome	Strand (+/-)	Type	Exon 1	Exon 2	Gel	SR	ONT cDNA	ONT DRS	SRA	Mean Poly(A) Length (nt)	Top Motif	Distance to TES (nt)	Median Poly(A) Length (nt)	Poly(A) IQR
1	TVAGG3_0972410	protein serine/threonine kinase protein	CM044617	➕	TypeA	12,048,662 - 12,049,270	12,049,381 - 12,050,259	✔️	✔️	✔️	✔️	✔️	93.7009	AATAAA	66	90.245	0
2	TVAGG3_0997450	GTPase activator protein	CM044617	➖	TypeA	16,583,318 - 16,585,700	16,583,318 - 16,585,006	✔️	✔️	✔️	✔️	✔️		ATTAAA	147	74.04	0
3	TVAGG3_0998160	transcription initiation factor TFIID subunit 6 (TAF6)	CM044617	➖	TypeA	16729011 - 16729444	16,728,049 - 16,728,919	✔️	✔️	✔️	✔️	✔️		AATAAA	63	73.005	0
4	TVAGG3_0998660	RNA-binding protein family	CM044617	➕	TypeA	16,844,159 - 16,844,531	16,844,616 - 16,844,938	✔️	✔️	✔️	✔️	✔️	83.112	AATAAA	375	85.96	29.87
5	TVAGG3_1019300	GTPase activating protein, Rab family	CM044617	➕	TypeA	20,398,531 - 20,399,281	20,399,349 - 20,399,959	✔️	❌	❌	❌	✔️		AATAAA	19	64.2	0
6	TVAGG3_1043790	protein kinase protein	CM044617	➕	TypeA	24,508,446 - 24,508,748	24,508,817 - 24,509,626	✔️	✔️	✔️	✔️	✔️	76.8633	AATAAA	1126	87.015	23.355
7	TVAGG3_1058000	protein kinase protein	CM044617	➕	TypeA	27,092,654 - 27,092,947	27,093,007 - 27,093,834	✔️	✔️	✔️	❌	✔️	47.0229	AATAAA	1631	78.54	29.08
8	TVAGG3_0511450	protein kinase involved in positive regulation of hh target transcription factor protein	CM044618	➕	TypeA	9,019,613 - 9,020,276	9,020,355 - 9,020,722	❌	✔️	❌	❌	✔️		AATAAA	-427	38.78	21.43
9	TVAGG3_0536040	hypothetical protein	CM044618	➕	n.a.	12,942,761 - 12,944,896	12,945,386 - 12,946,585	❌	✔️	❌	❌	❌		AATAAA	1627	61.895	0
10	TVAGG3_0562330	M60 like 2 family	CM044618	➕	n.a.	17,588,486 - 17,591,432	17,594,603 - 17,594,622	❌	❌	❌	❌	✔️
11	TVAGG3_0644560	phosphoprotein phosphatase protein	CM044619	➖	TypeA	5,083,768 - 5,084,085	5,083,152 - 5,083,700	✔️	✔️	✔️	✔️	✔️		AATAAA	300	86.1075	21.5325
12	TVAGG3_0656270	protein serine/threonine kinase protein	CM044619	➖	TypeB	7,058,307 - 7,058,383	7,057,027 - 7,058,281	✔️	✔️	✔️	✔️	✔️	94.21	ATTAAA	392	57.575	0
13	TVAGG3_0661130	protein serine/threonine kinase protein	CM044619	➖	TypeA	7,810,132 - 7,810,696	7,809,680 - 7,810,038	✔️	✔️	✔️	✔️	✔️			26
14	TVAGG3_0677070	protein kinase and peptidyl-serine phosphorylation	CM044619	➖	TypeA	10,457,246 - 10,458,428	10,456,043 - 10,457,049	✔️	✔️	✔️	✔️	✔️		AATAAA	127	68.87	15.16
15	TVAGG3_0764700	protein kinase protein	CM044619	➕	TypeA	25,747,705 - 25,748,010	25,748,104 - 25,748,934	✔️	✔️	✔️	✔️	✔️	48.9596	AATAAA	231	44.285	0
16	TVAGG3_0006570	small Rab GTPase Rab1a	CM044620	➕	TypeB	1,090,859 - 1,090,875	1,090,901 - 1,091,492	✔️	✔️	✔️	✔️	✔️	55.3918	AATAAA	1505	53.345	12.945
17	TVAGG3_0032670	Mob1/phocein family	CM044620	➖	TypeB	5,012,768 - 5,012,787	5,012,103 - 5,012,742	✔️	✔️	✔️	❌	✔️		ATTAAA	1195	53.5975	10.3475
18	TVAGG3_0047895	protein kinase	CM044620	➕	n.a.	7,554,131 - 7,554,391	7,554,921 - 7,555,316	❌	✔️	❌	❌	❌		AATAAA	-492	57.23	0
19	TVAGG3_0108840	armadillo (ARM) repeat-containing protein family	CM044620	➖	TypeB	16,862,655 - 16,862,818	16,861,471 - 16,862,629	✔️	✔️	✔️	✔️	✔️		AATAAA	49	79.225	12.025
20	TVAGG3_0136820	protein ubiquitination	CM044620	➖	TypeA	20,646,171 - 20,646,289	20,645,069 - 20,646,098	✔️	✔️	✔️	✔️	✔️	57.8633		425
21	TVAGG3_0182080	phosphoprotein phosphatase protein	CM044620	➖	TypeA	28,040,597 - 28,041,010	28,039,969 - 28,040,526	✔️	✔️	❌	❌	❌		AATAAA	232	58.16	0.32
22	TVAGG3_0199570	protein kinase	CM044620	➖	TypeA	31,017,072 - 31,017,380	31,016,130 - 31,016,966	✔️	✔️	✔️	❌	✔️		AATAAA	330	89	0
23	TVAGG3_0276730	ubiquitin 13 family	CM044621	➕	n.a.	4,308,763 - 4,309,299	4,309,528 - 4,309,680	❌	✔️	❌	✔️	✔️	61.3999	AATAAA	461	68.96	0
24	TVAGG3_0283200	enzyme binding ARM repeat protein	CM044621	➖	TypeB	5,468,994 - 5,469,085	5,467,798 - 5,468,968	✔️	✔️	✔️	✔️	✔️		AATAAA	1339	72.77	11.95
25	TVAGG3_0288310	NLI interacting factor-like phosphoprotein phosphatase	CM044621	➖	TypeA	6,341,934 - 6,342,344	6,341,300 - 6,341,857	✔️	✔️	✔️	✔️	✔️	95.26	ATTAAA	-338	95.26	0
26	TVAGG3_0299880	protein serine/threonine kinase protein	CM044621	➕	TypeA	8,362,789 - 8,363,400	8,363,535 - 8,364,377	✔️	✔️	✔️	✔️	❌	87.1875	ATTAAA	95	78.67	0
27	TVAGG3_0367480	intracellular sterol transport	CM044621	➖	n.a.	19,803,109 - 19,803,628	19,802,876 - 19,803,072	❌	✔️	✔️	✔️	✔️	62.6671	AATAAA	1727	59.2	0
28	TVAGG3_0403570	protein serine/threonine kinase protein	CM044621	➖	TypeA	25,903,948 - 25,904,479	25,903,290 - 25,903,879	✔️	✔️	✔️	❌	✔️		AATAAA	158	73.575	31.2425
29	TVAGG3_0792740	hypothetical protein	CM044622	➖	n.a.	2,382,751 - 2,383,429	2,382,643 - 2,382,686	✔️	✔️	✔️	✔️	✔️	52.17	AATAAA	137	50.14	13.9925
30	TVAGG3_0852200	transcription initiation factor TFIID subunit 6 (TAF6)	CM044622	➕	TypeA	12,342,625 - 12,342,971	12,343,053 - 12,343,887	✔️	✔️	✔️	✔️	✔️	46.32	AATAAA	144	53.0275	7.1125
31	TVAGG3_0860620	protein serine/threonine kinase protein	CM044622	➕	TypeA	13,741,660 - 13,742,200	13,742,300 - 13,743,048	✔️	✔️	✔️	✔️	✔️	73.0033	ATTAAA	817	69.5325	5.8675
