# Supplementary material
Source: Research Square preprint supplement (doi:10.21203/rs.3.rs-9068139/v1)
Supplement: Supplementary file 5 [file e17f61a97e744b6738b4e941.xlsx]

## Sheet: 工作表1
Protein Accession	Peptide Sequence	Modifications	Charge (z)	m/z [Da]	Theo. MH+ [Da]	DeltaM [ppm]	XCorr	Confidence
TVAGG3_CG07_L495	IADFGFAR	None	2	448.737	896.462	3.85	2.59	High
TVAGG3_CG07_L495	IADFGFAR	None	2	448.736	896.462	2.42	2.31	High
TVAGG3_CG07_L495	IADFGFAR	None	2	448.737	896.462	3.85	2.26	High
TVAGG3_CG07_L495	IADFGFAR	None	2	448.736	896.462	2.76	2.23	High
TVAGG3_CG07_L495	IADFGFAR	None	2	448.736	896.462	3.37	2.11	High
TVAGG3_CG07_L495	IADFGFAR	None	2	448.736	896.462	3.65	2.09	High
TVAGG3_CG08_L615	NSYELTATLLmFLNmLAVSMR	M11(Oxidation); M15(Oxidation)	4	613.304	2450.21	-8.18	3.04	High
